# Supplementary material for: Human population structure detection via multilocus genotype clustering
Source: PubMed Central journal article supplement (PMC1934381; doi:10.1186/1471-2156-8-34), 2007-06-25
Supplement: 1471-2156-8-34-S1.pdf [file 1471-2156-8-34-S1.pdf]

Branch Height

0 2 4 6 8 10 12

YRI22  
YRI59  
YRI35  
YRI38  
YRI49  
YRI23  
YRI57  
YRI12  
YRI47  
YRI42  
YRI41  
YRI19  
YRI33  
YRI39  
YRI45  
YRI36  
YRI13  
YRI32  
YRI48  
YRI9  
YRI30  
YRI53  
YRI11  
YRI21  
YRI44  
YRI10  
YRI34  
YRI14  
YRI18  
YRI37  
YRI51  
YRI29  
YRI31  
YRI55  
YRI60  
YRI26  
YRI27  
YRI8  
YRI56  
YRI12  
YRI17  
YRI50  
YRI3  
YRI54  
YRI58  
YRI5  
YRI43  
YRI20  
YRI46  
YRI40  
YRI7  
YRI25  
YRI15  
YRI52  
YRI16  
YRI28  
YRI24  
YRI6  
YRI1  
YRI4  
CEU9  
CEU59  
CEU26  
CEU42  
CEU10  
CEU37  
CEU51  
CEU1  
CEU38  
CEU40  
CEU2  
CEU5  
CEU19  
CEU56  
CEU32  
CEU20  
CEU46  
CEU35  
CEU16  
CEU50  
CEU15  
CEU47  
CEU24  
CEU31  
CEU29  
CEU55  
CEU14  
CEU23  
CEU39  
CEU21  
CEU45  
CEU8  
CEU58  
CEU33  
CEU44  
CEU22  
CEU57  
CEU30  
CEU36  
CEU11  
CEU3  
CEU43  
CEU17  
CEU53  
CEU60  
CEU13  
CEU28  
CEU7  
CEU41  
CEU18  
CEU54  
CEU25  
CEU48  
CEU6  
CEU34  
CEU49  
CEU12  
CEU52  
CEU4  
CEU27  
JPT25  
CHB12  
CHB24  
JPT29  
JPT5  
JPT16  
CHB6  
CHB29  
CHB27  
JPT44  
CHB39  
JPT1  
JPT20  
CHB16  
CHB38  
CHB25  
CHB44  
CHB1  
CHB5  
CHB7  
JPT17  
JPT26  
CHB40  
JPT28  
JPT34  
CHB11  
CHB36  
CHB37  
JPT21  
JPT4  
JPT31  
JPT36  
JPT32  
JPT43  
JPT13  
JPT39  
CHB45  
JPT30  
CHB28  
CHB33  
JPT15  
CHB19  
JPT2  
CHB22  
CHB4  
CHB30  
CHB2  
CHB10  
CHB14  
JPT35  
CHB18  
CHB43  
JPT41  
CHB3  
JPT23  
CHB20  
CHB31  
CHB42  
CHB41  
JPT38  
JPT22  
JPT33  
CHB35  
JPT11  
JPT12  
JPT19  
JPT27  
CHB13  
CHB34  
JPT40  
JPT32  
JPT9  
JPT24  
JPT8  
CHB23  
JPT37  
JPT3  
JPT7  
CHB21  
JPT18  
JPT14  
CHB9  
CHB8  
JPT10  
CHB26  
JPT42  
JPT6  
CHB15  
CHB17

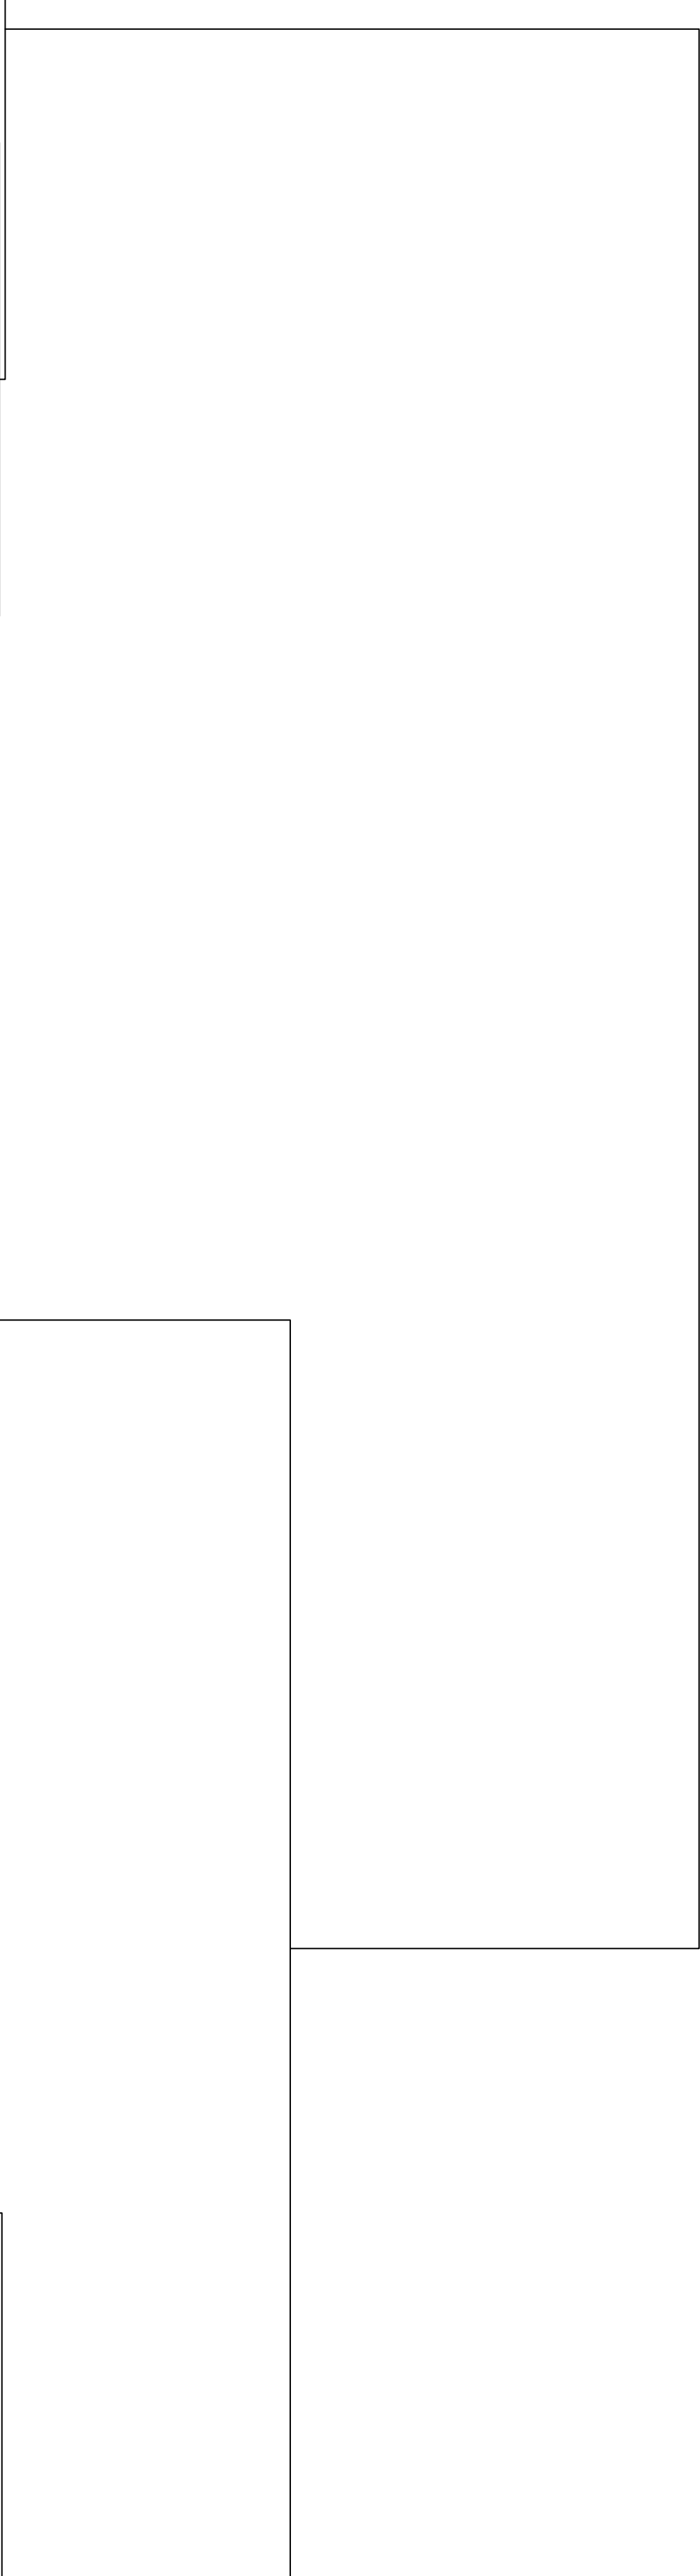

CEU, YRI, CHB and JPT Dendrogram
