# Supplementary material for: Human population structure detection via multilocus genotype clustering
Source: PubMed Central journal article supplement (PMC1934381; doi:10.1186/1471-2156-8-34), 2007-06-25
Supplement: 1471-2156-8-34-S2.pdf [file 1471-2156-8-34-S2.pdf]

Branch Height

0 2 4 6 8 10 12

YRI22  
YRI59  
YRI33  
YRI47  
YRI38  
YRI23  
YRI27  
YRI30  
YRI31  
YRI19  
YRI55  
YRI60  
YRI45  
YRI49  
YRI8  
YRI25  
YRI2  
YRI11  
YRI41  
YRI44  
YRI13  
YRI58  
YRI11  
YRI46  
YRI6  
YRI14  
YRI48  
YRI36  
YRI39  
YRI18  
YRI37  
YRI35  
YRI57  
YRI24  
YRI3  
YRI4  
YRI12  
YRI52  
YRI54  
YRI40  
YRI51  
YRI42  
YRI32  
YRI29  
YRI7  
YRI34  
YRI9  
YRI15  
YRI10  
YRI53  
YRI56  
YRI43  
YRI50  
YRI17  
YRI20  
YRI5  
YRI21  
YRI26  
YRI16  
YRI28  
CEU25  
CEU27  
CEU42  
CEU1  
CEU12  
CEU47  
CEU48  
CEU7  
CEU15  
CEU13  
CEU39  
CEU16  
CEU11  
CEU23  
CEU4  
CEU18  
CEU26  
CEU57  
CEU60  
CEU32  
CEU58  
CEU38  
CEU19  
CEU9  
CEU17  
CEU46  
CEU55  
CEU53  
CEU5  
CEU2  
CEU8  
CEU31  
CEU10  
CEU21  
CEU41  
CEU50  
CEU37  
CEU28  
CEU52  
CEU14  
CEU35  
CEU34  
CEU40  
CEU20  
CEU56  
CEU22  
CEU24  
CEU29  
CEU36  
CEU6  
CEU45  
CEU49  
CEU51  
CEU3  
CEU30  
CEU43  
CEU33  
CEU54  
CEU44  
CEU59  
CHB2  
CHB13  
CHB1  
CHB8  
CHB35  
CHB7  
CHB40  
CHB14  
CHB4  
CHB38  
CHB22  
CHB31  
CHB11  
CHB12  
CHB44  
CHB32  
CHB10  
CHB26  
CHB36  
CHB17  
CHB34  
CHB6  
CHB28  
CHB37  
CHB3  
CHB20  
CHB29  
CHB23  
CHB42  
CHB30  
CHB41  
CHB19  
CHB25  
CHB15  
CHB24  
JPT28  
CHB21  
CHB33  
CHB27  
CHB16  
CHB39  
CHB43  
CHB45  
CHB9  
CHB5  
CHB18  
JPT42  
JPT4  
JPT32  
JPT16  
JPT11  
JPT13  
JPT8  
JPT23  
JPT31  
JPT41  
JPT43  
JPT25  
JPT5  
JPT18  
JPT22  
JPT14  
JPT7  
JPT34  
JPT27  
JPT36  
JPT9  
JPT30  
JPT2  
JPT15  
JPT17  
JPT40  
JPT26  
JPT37  
JPT20  
JPT1  
JPT19  
JPT12  
JPT21  
JPT38  
JPT10  
JPT3  
JPT6  
JPT35  
JPT24  
JPT33  
JPT44  
JPT29  
JPT39

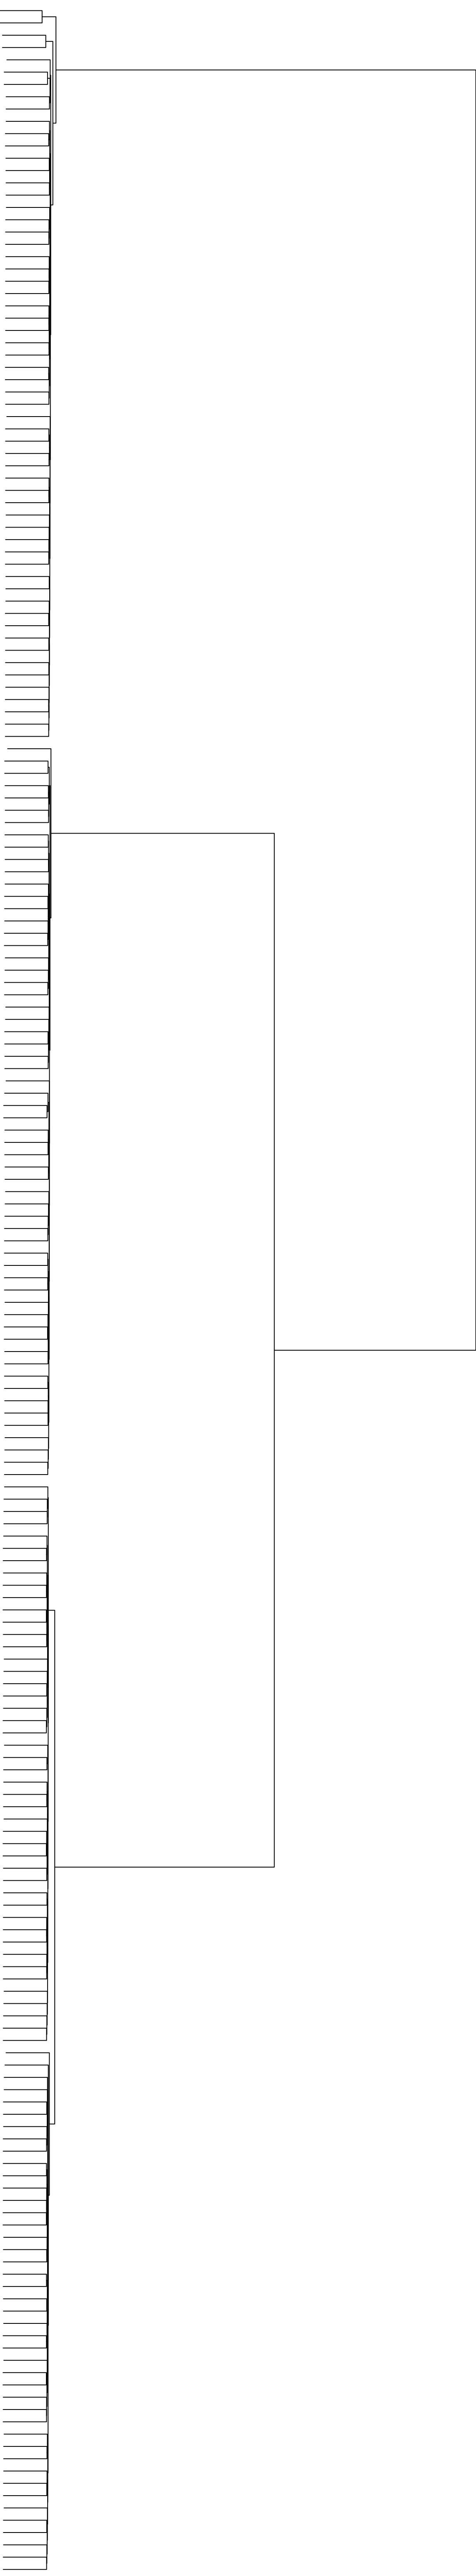

CEU, YRI, CHB and JPT Dendrogram
