# Supplementary material for: Human population structure detection via multilocus genotype clustering
Source: PubMed Central journal article supplement (PMC1934381; doi:10.1186/1471-2156-8-34), 2007-06-25
Supplement: 1471-2156-8-34-S3.pdf [file 1471-2156-8-34-S3.pdf]

Branch Height

0.40 0.45 0.50 0.55 0.60

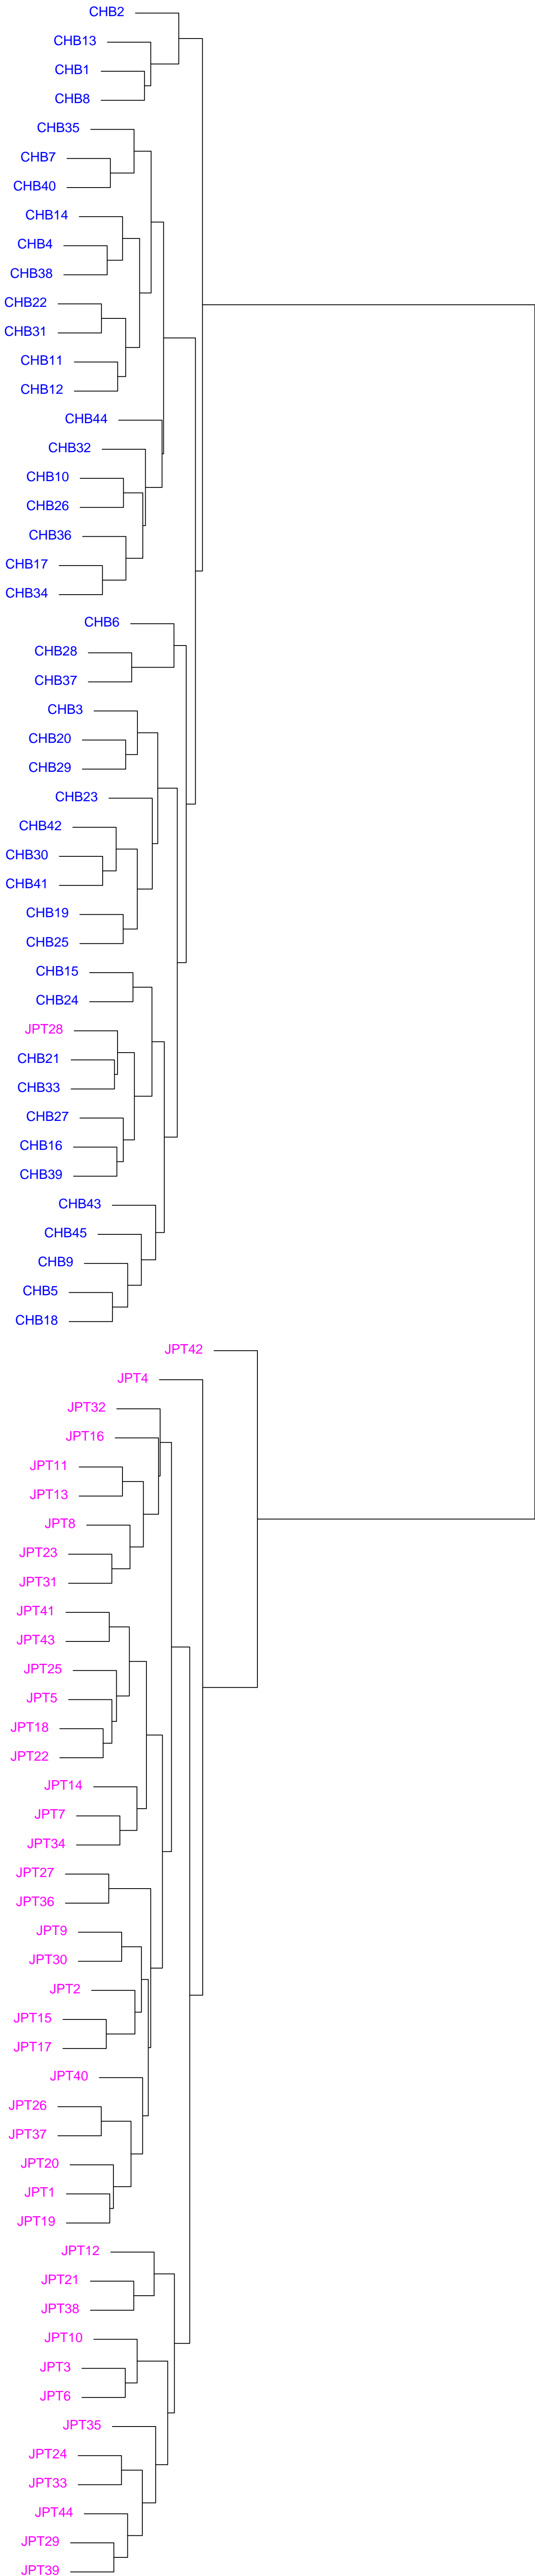

CHB and JPT Dendrogram
